# Supplementary material for: Transcriptional immunogenomic analysis reveals distinct immunological clusters in pediatric nervous system tumours
Source: bioRxiv or medRxiv preprint supplement (doi:10.1101/2022.09.20.508719), 2022-09-21
Supplement: Supplementary file [file media-1.pdf]

A)

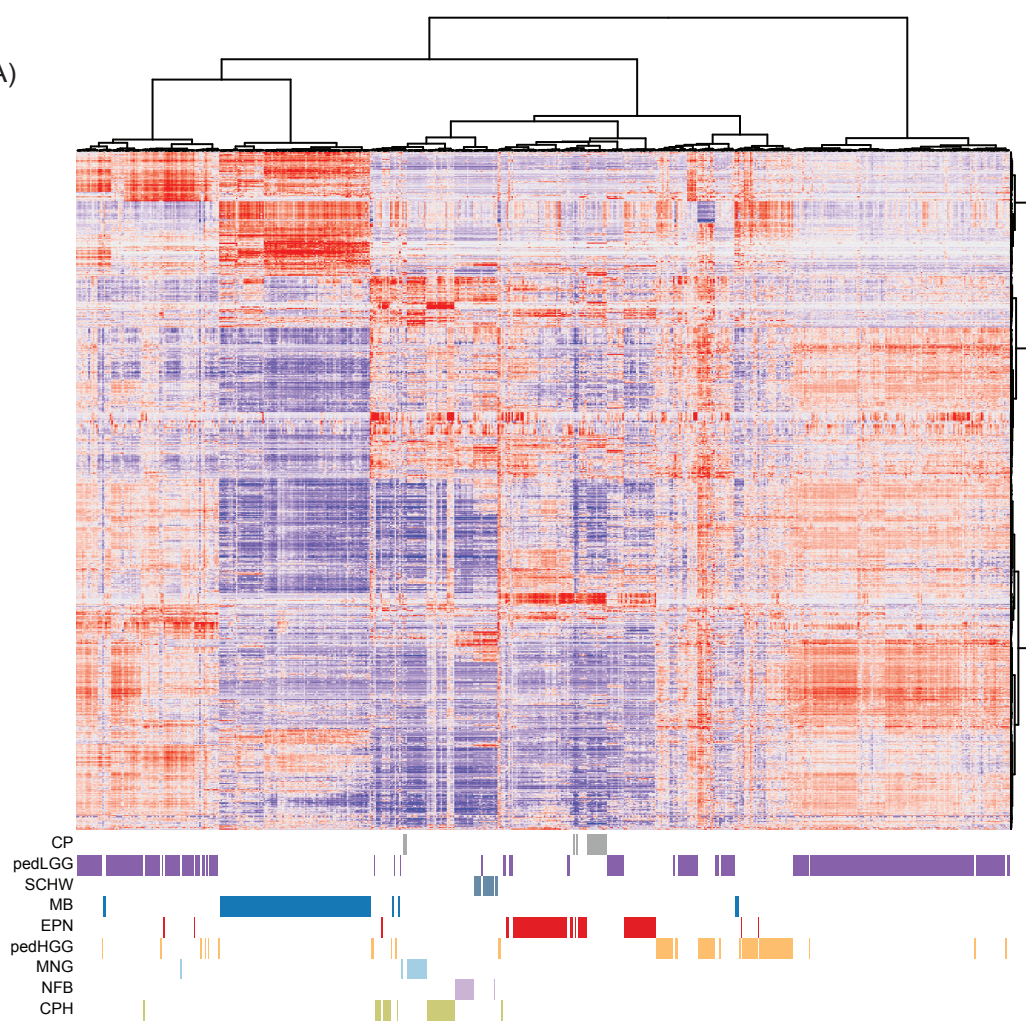

B)

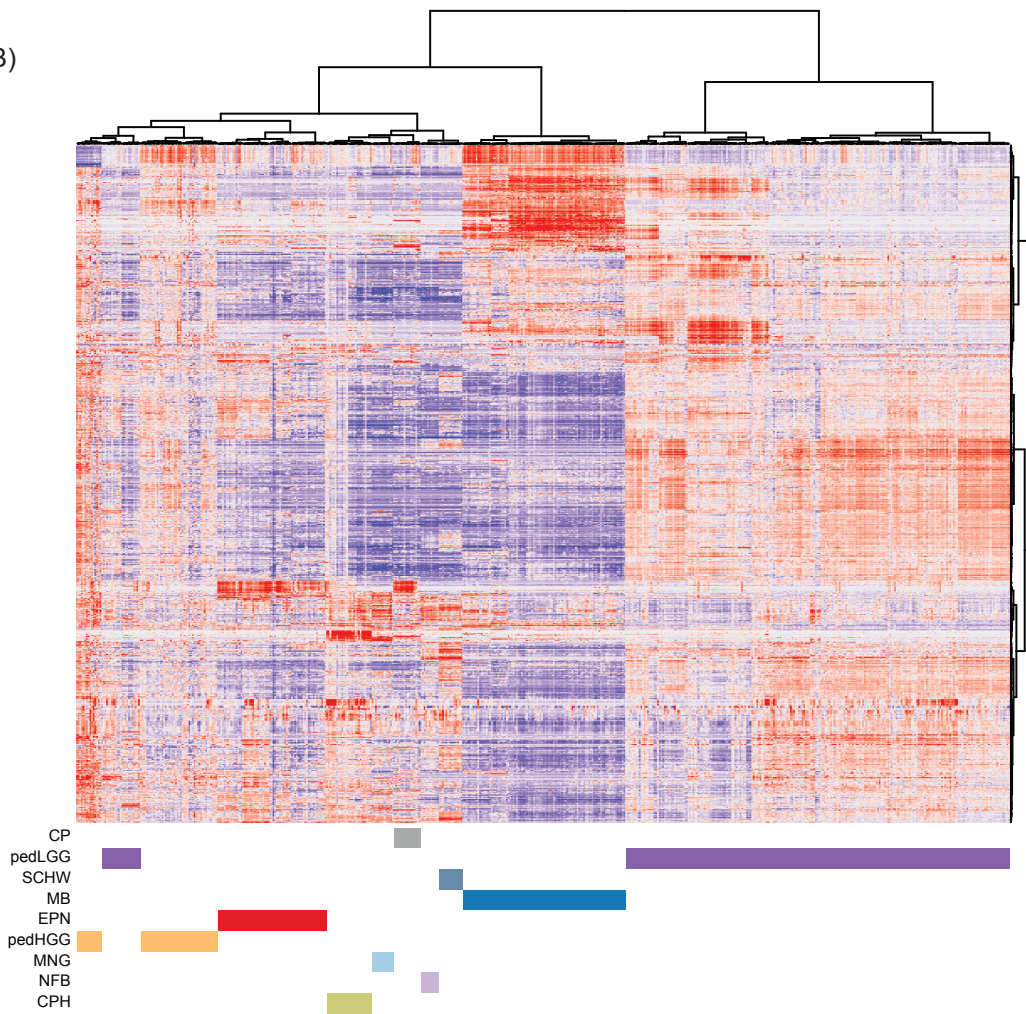

Figure S1

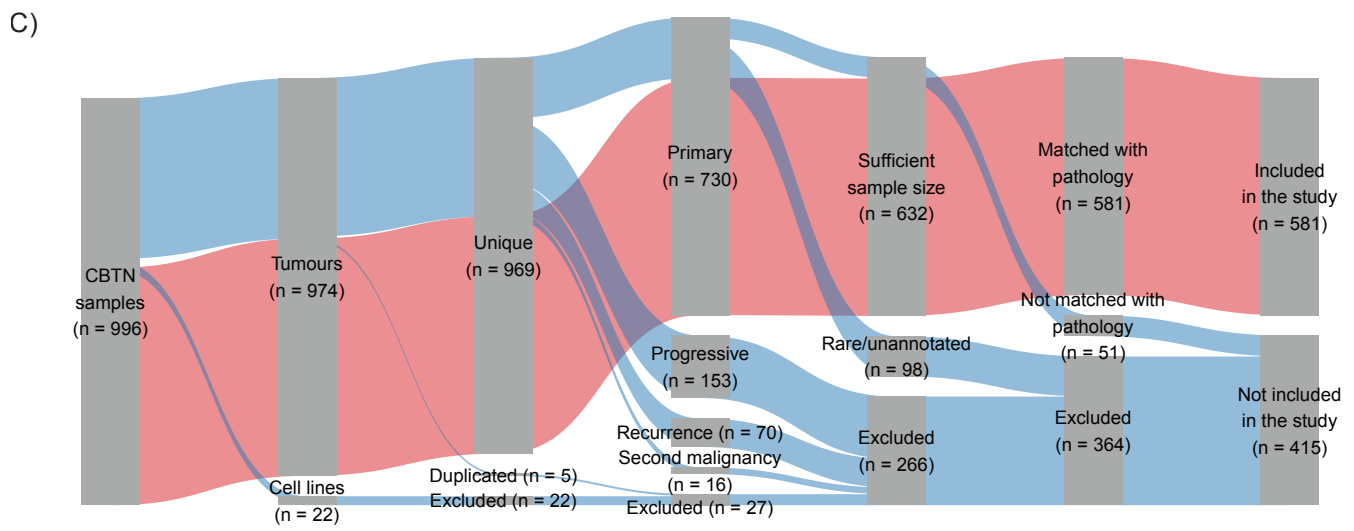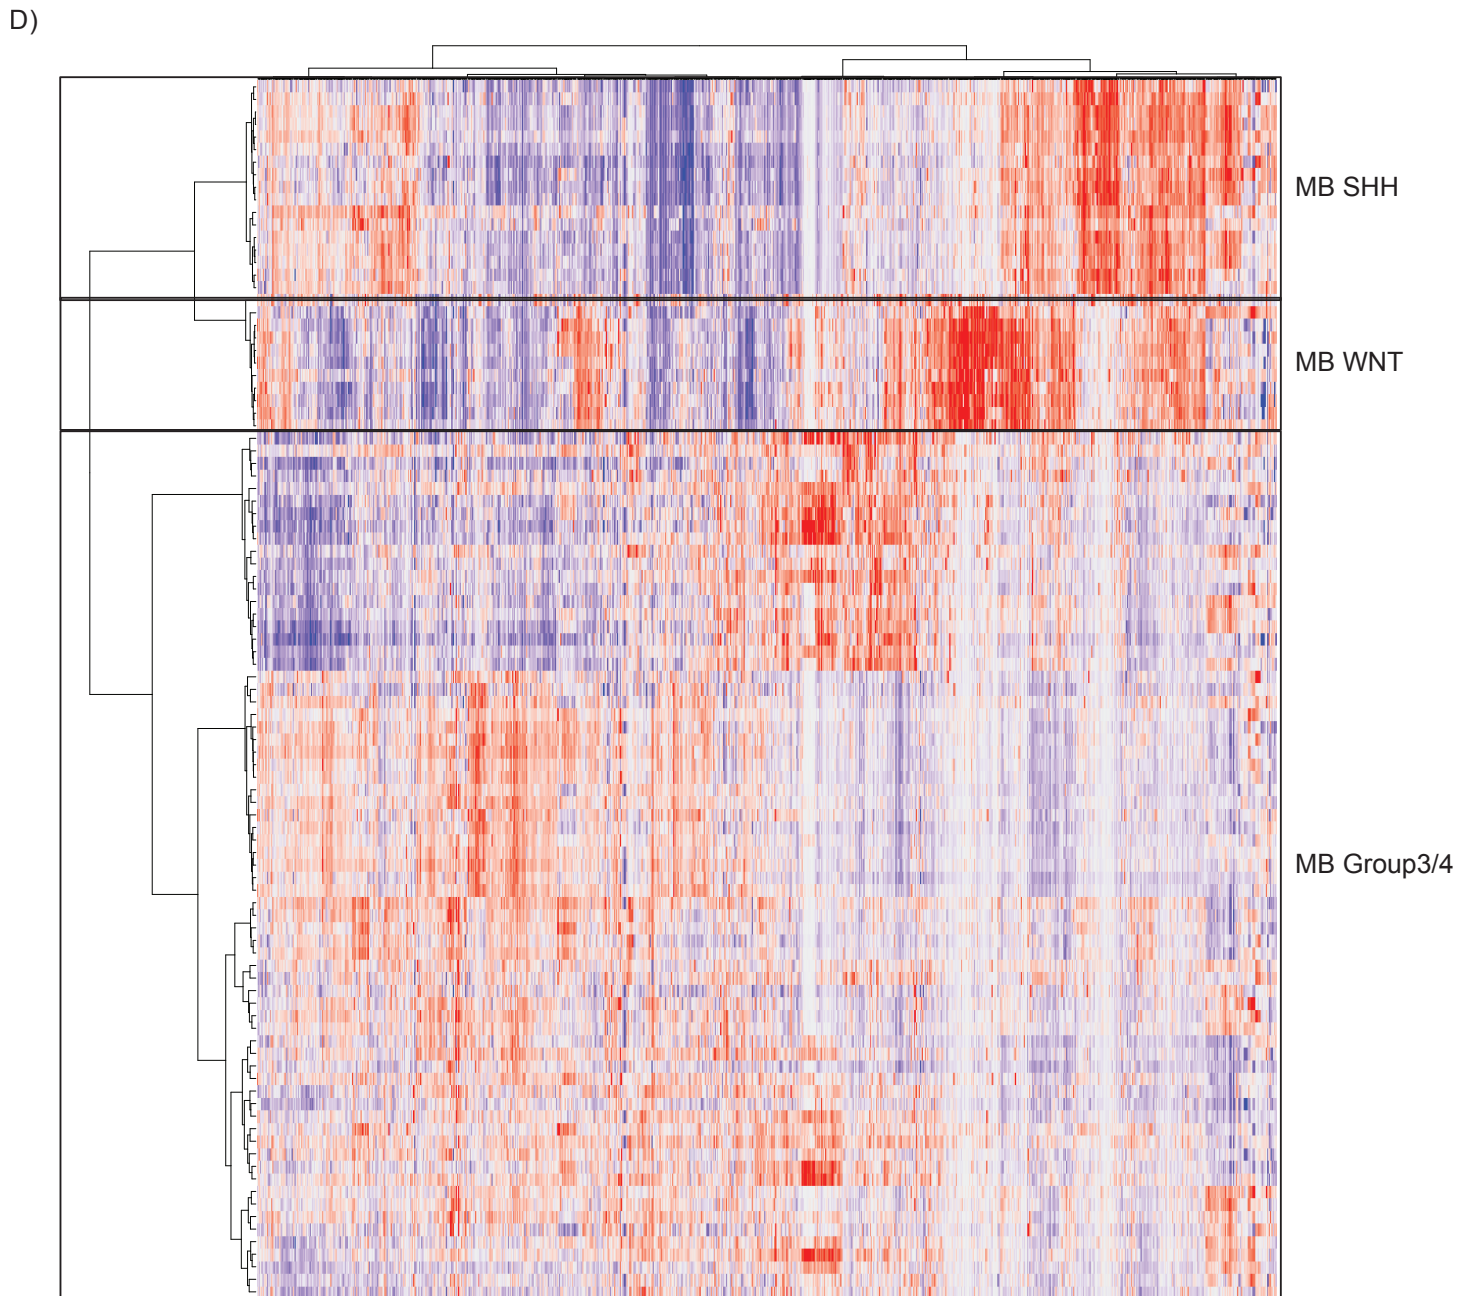

Figure S1

E)

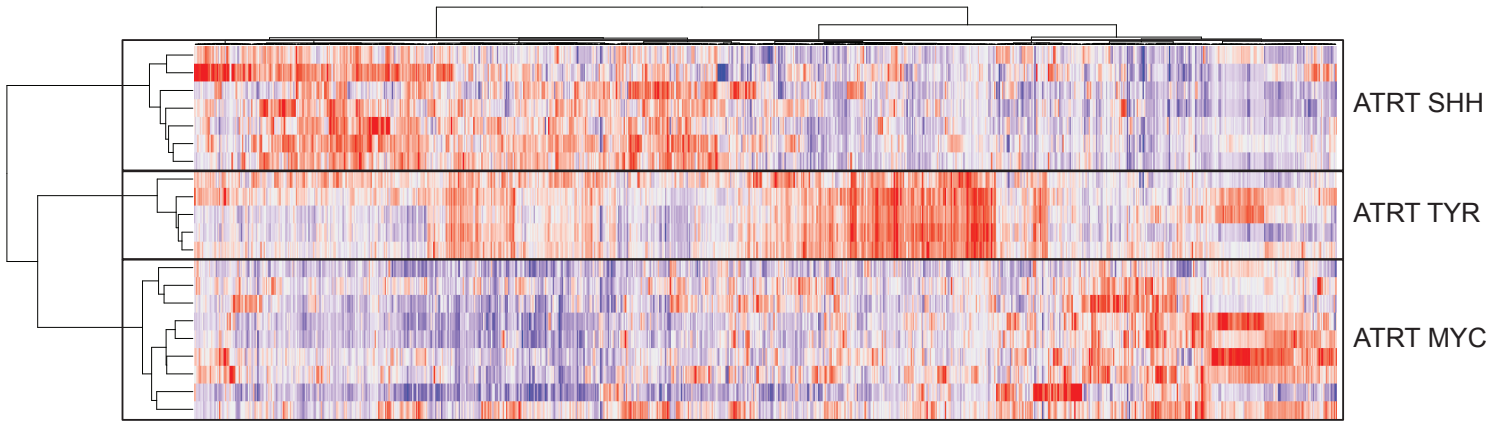

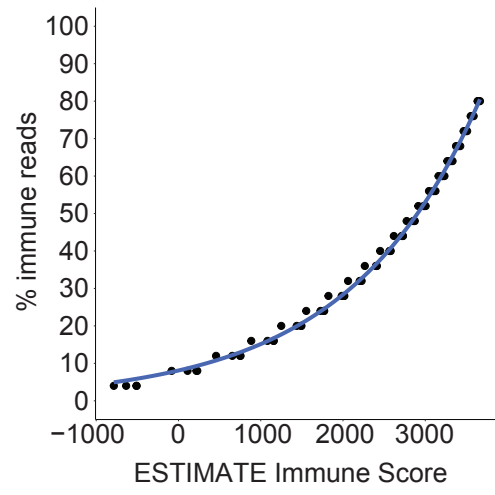

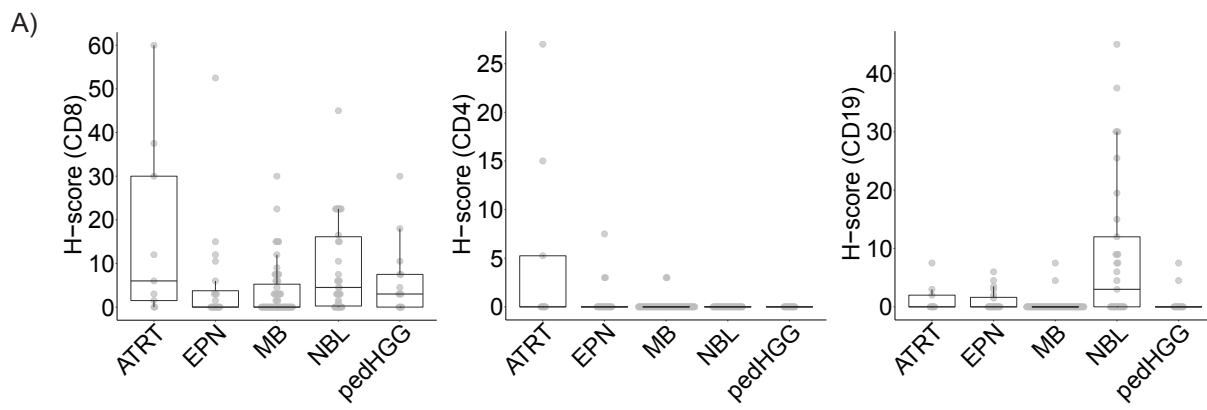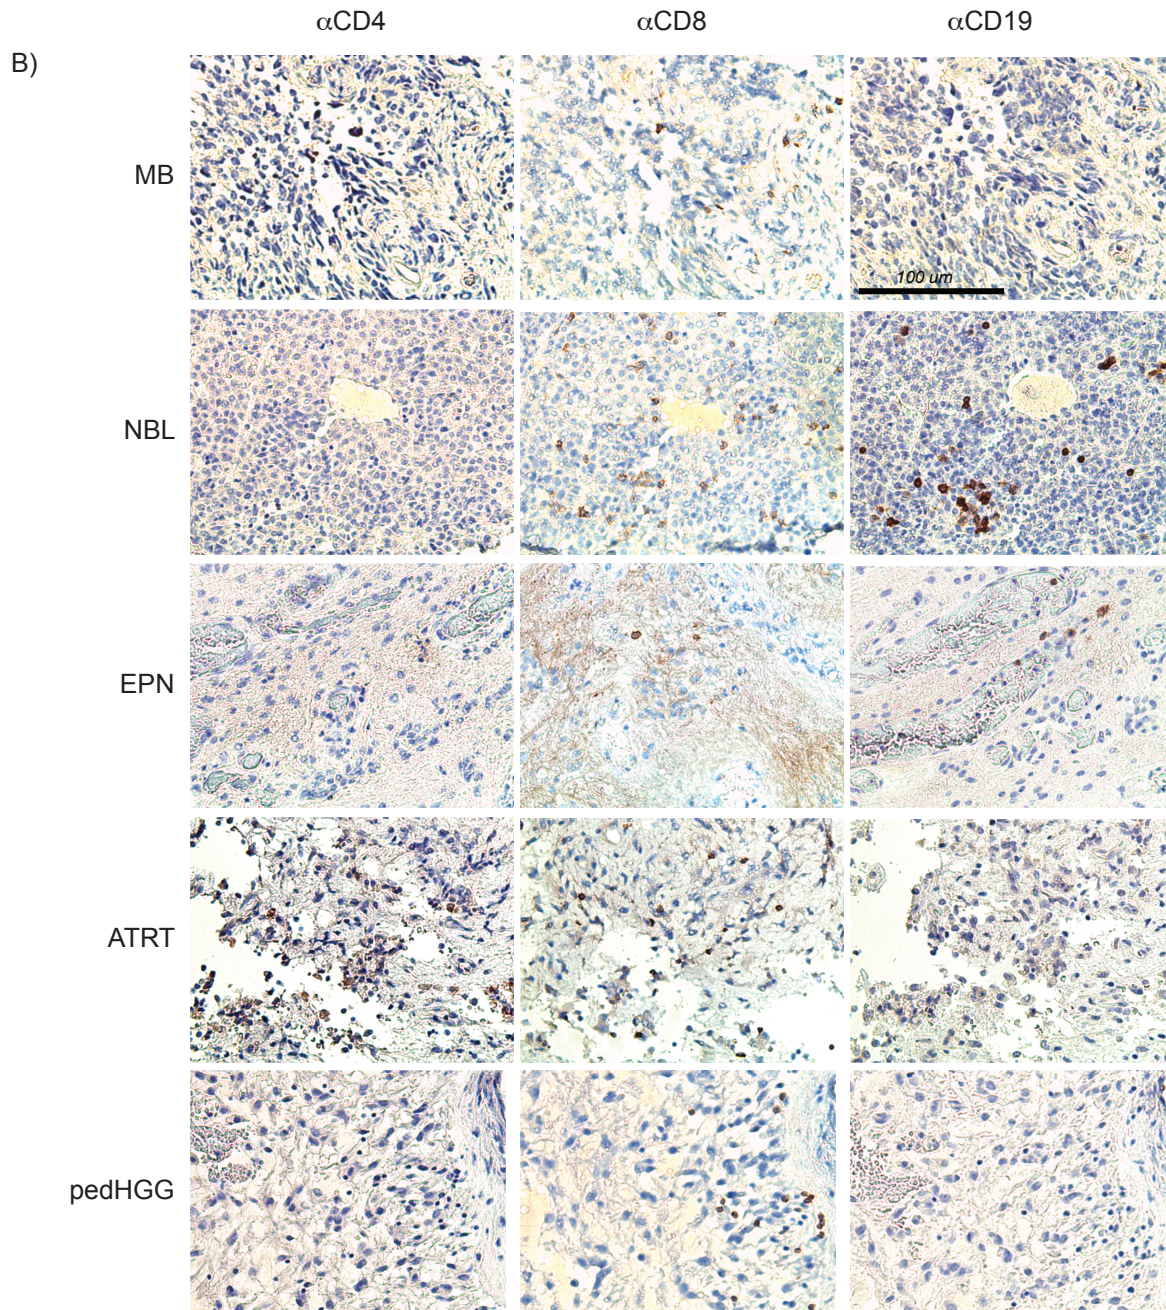

Figure S3

A)

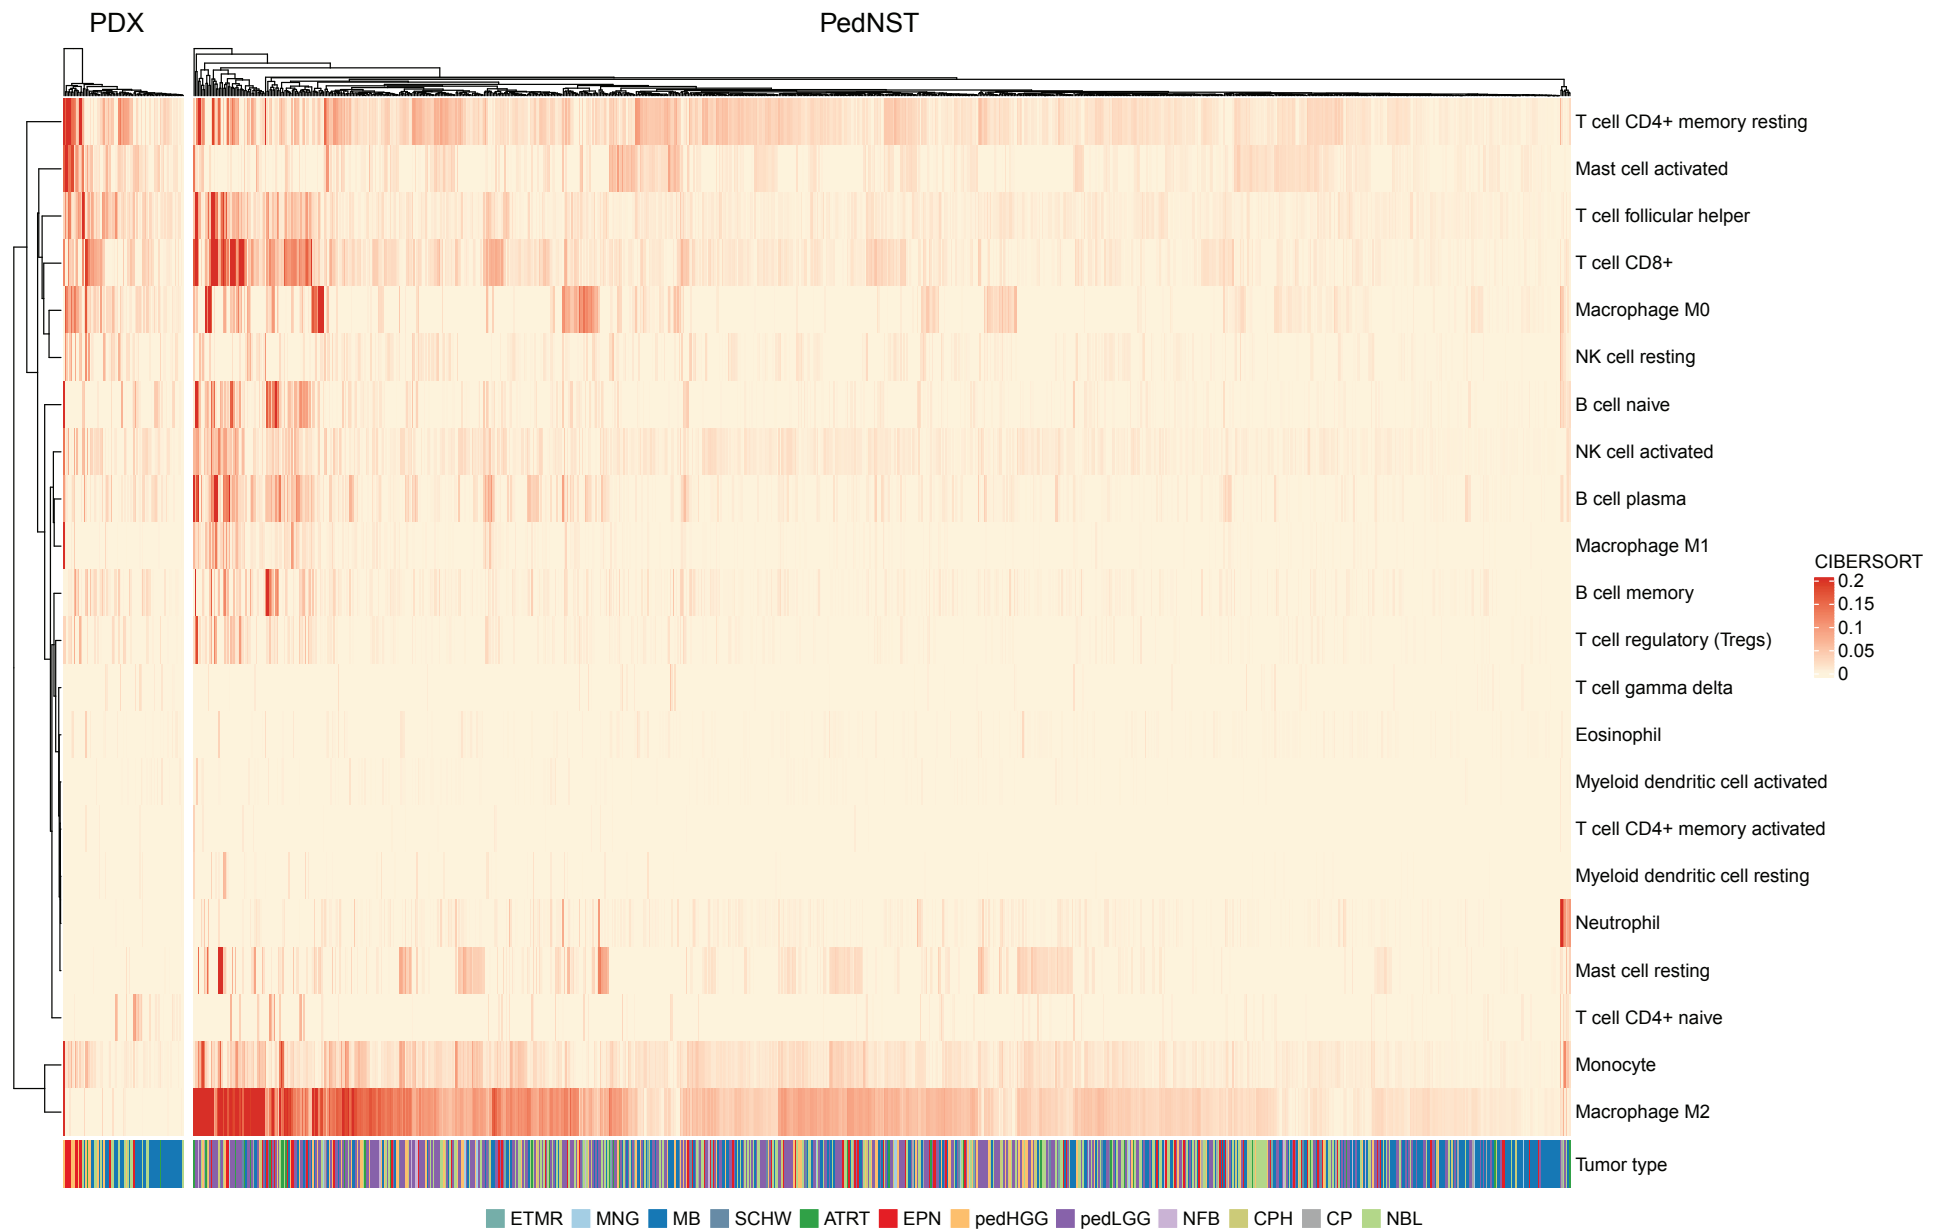

Figure S4

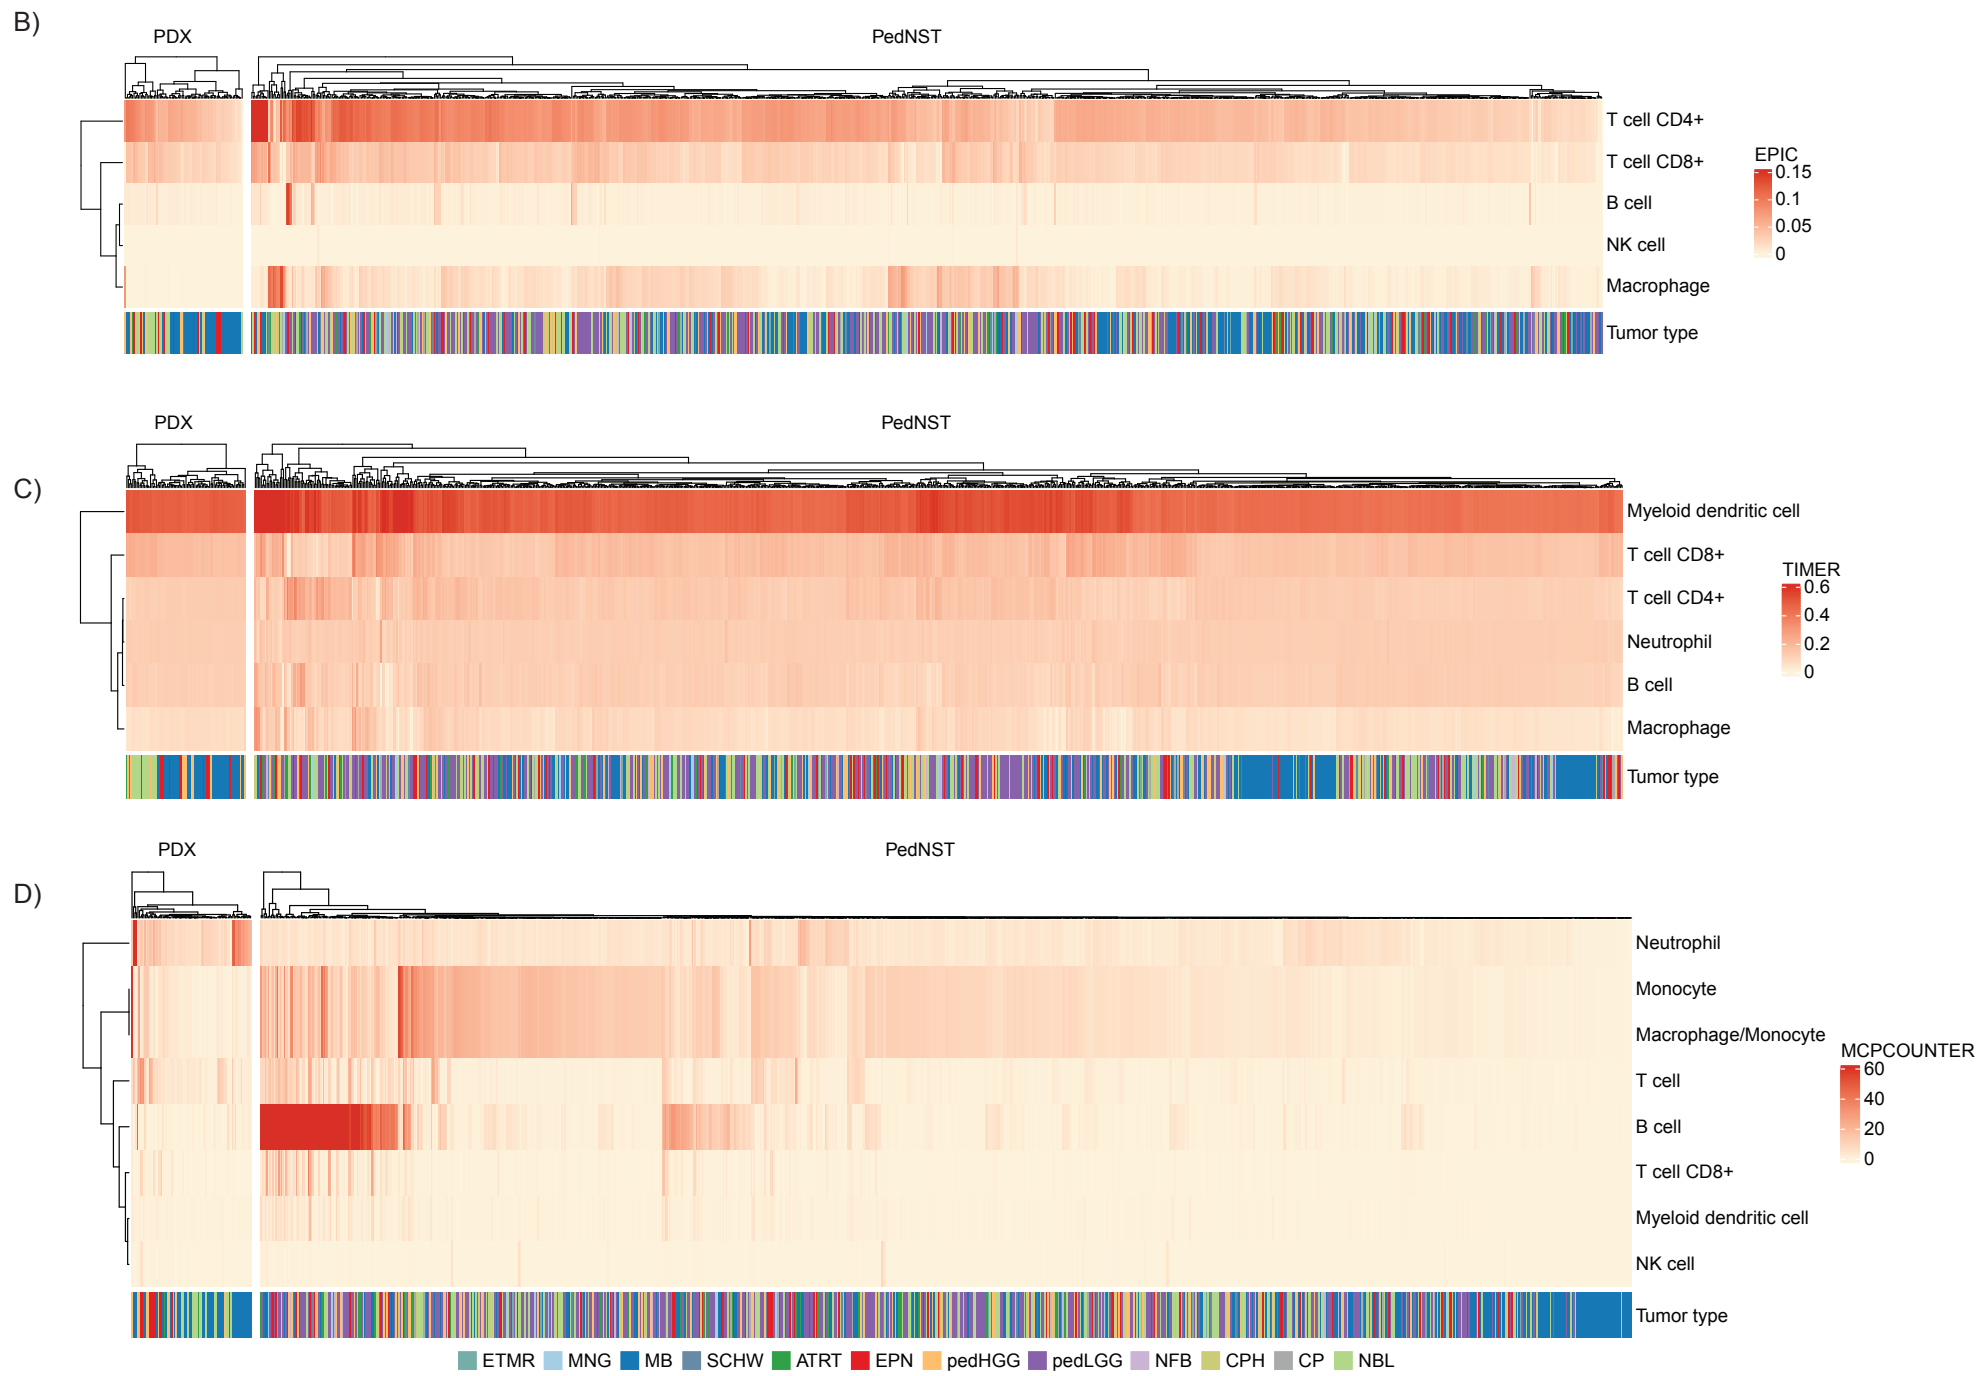

Figure S4

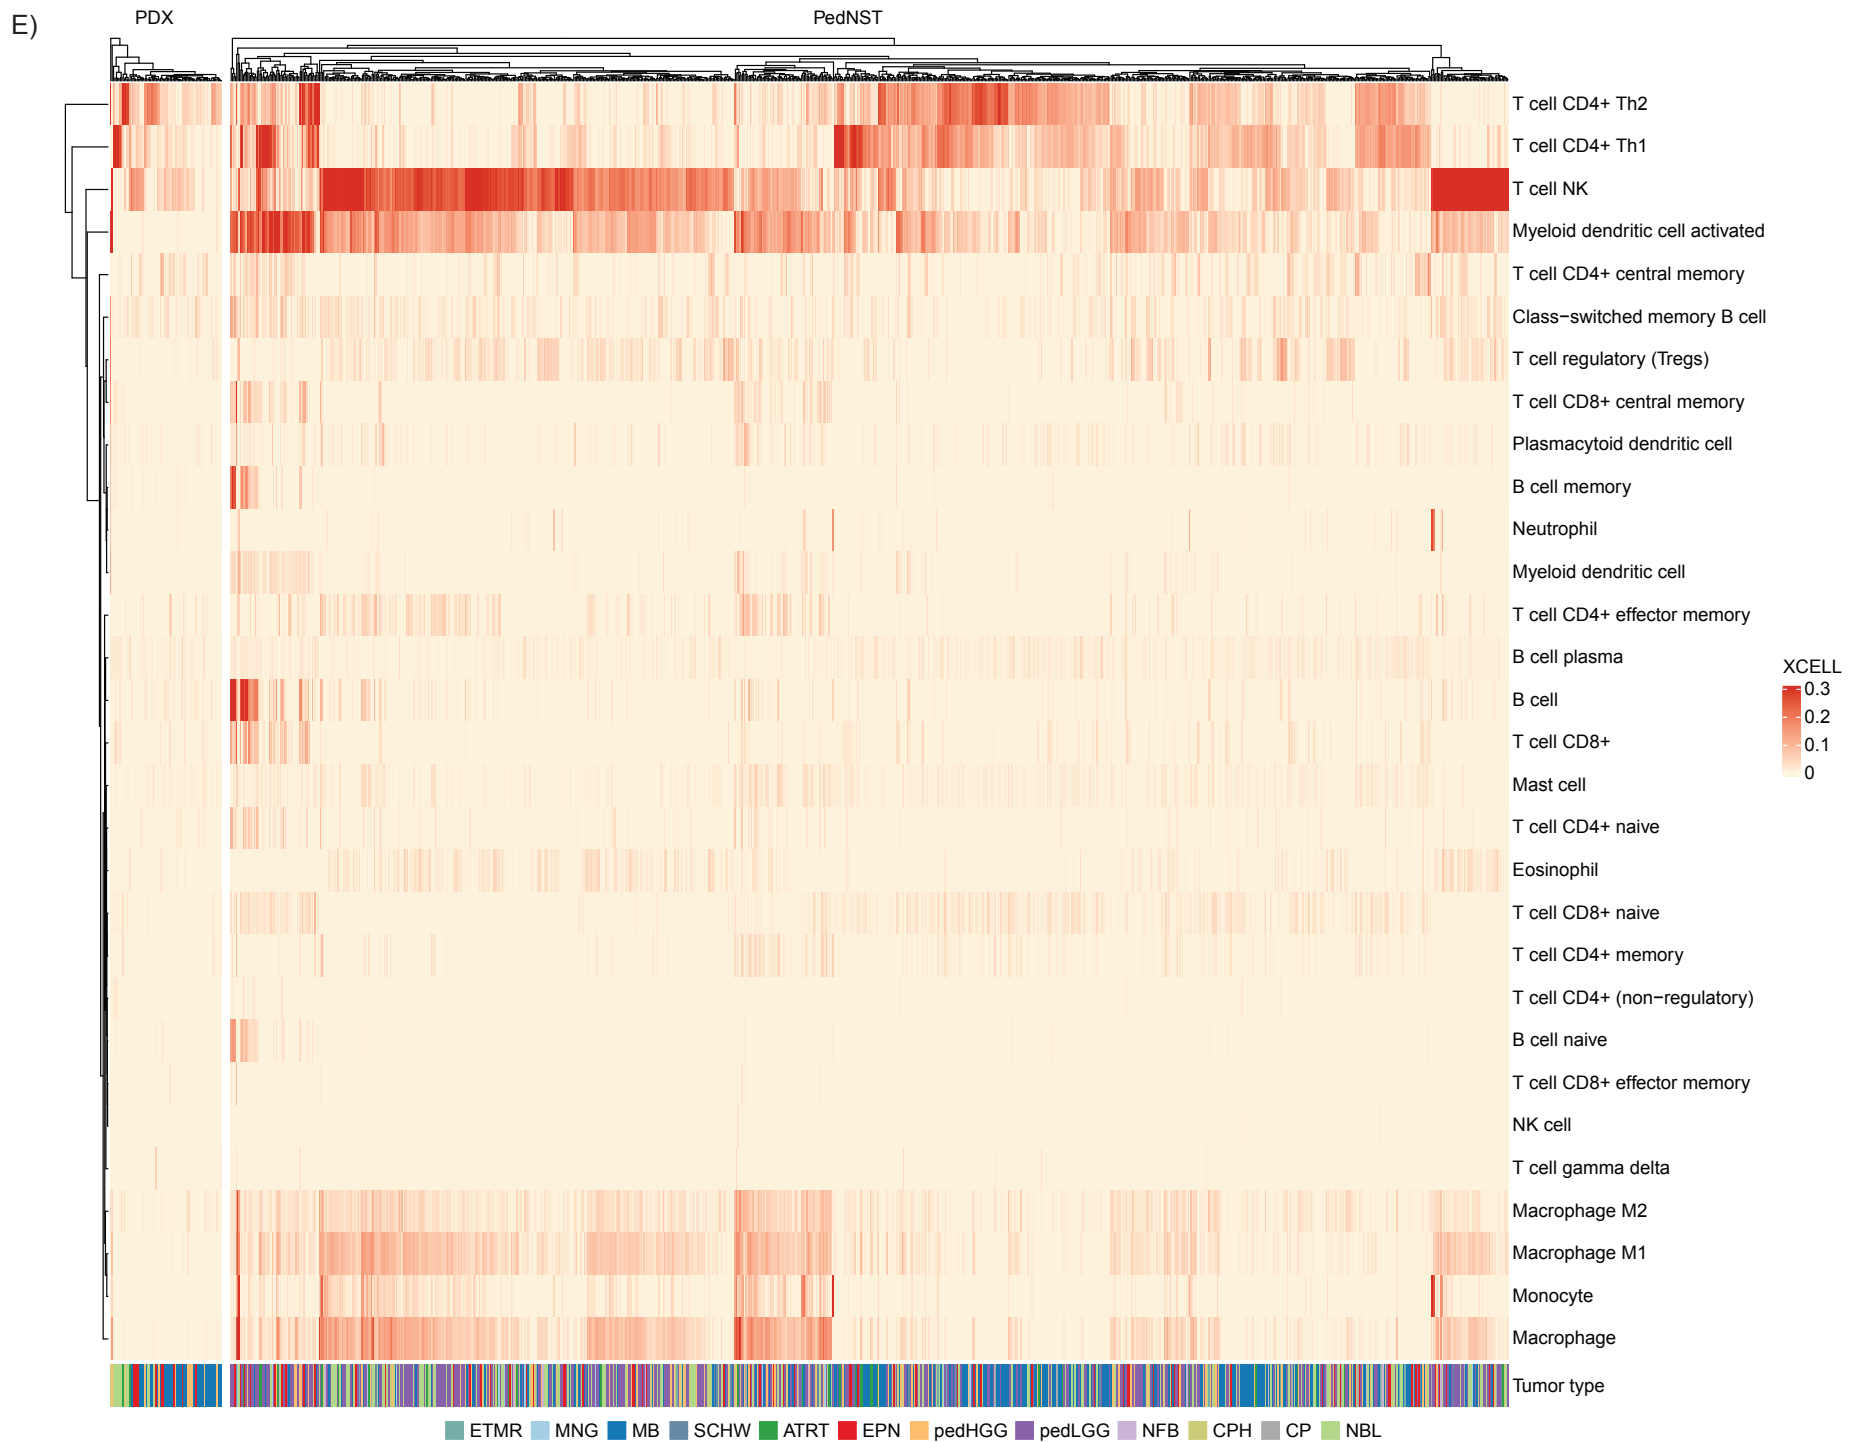

Figure S4



F)

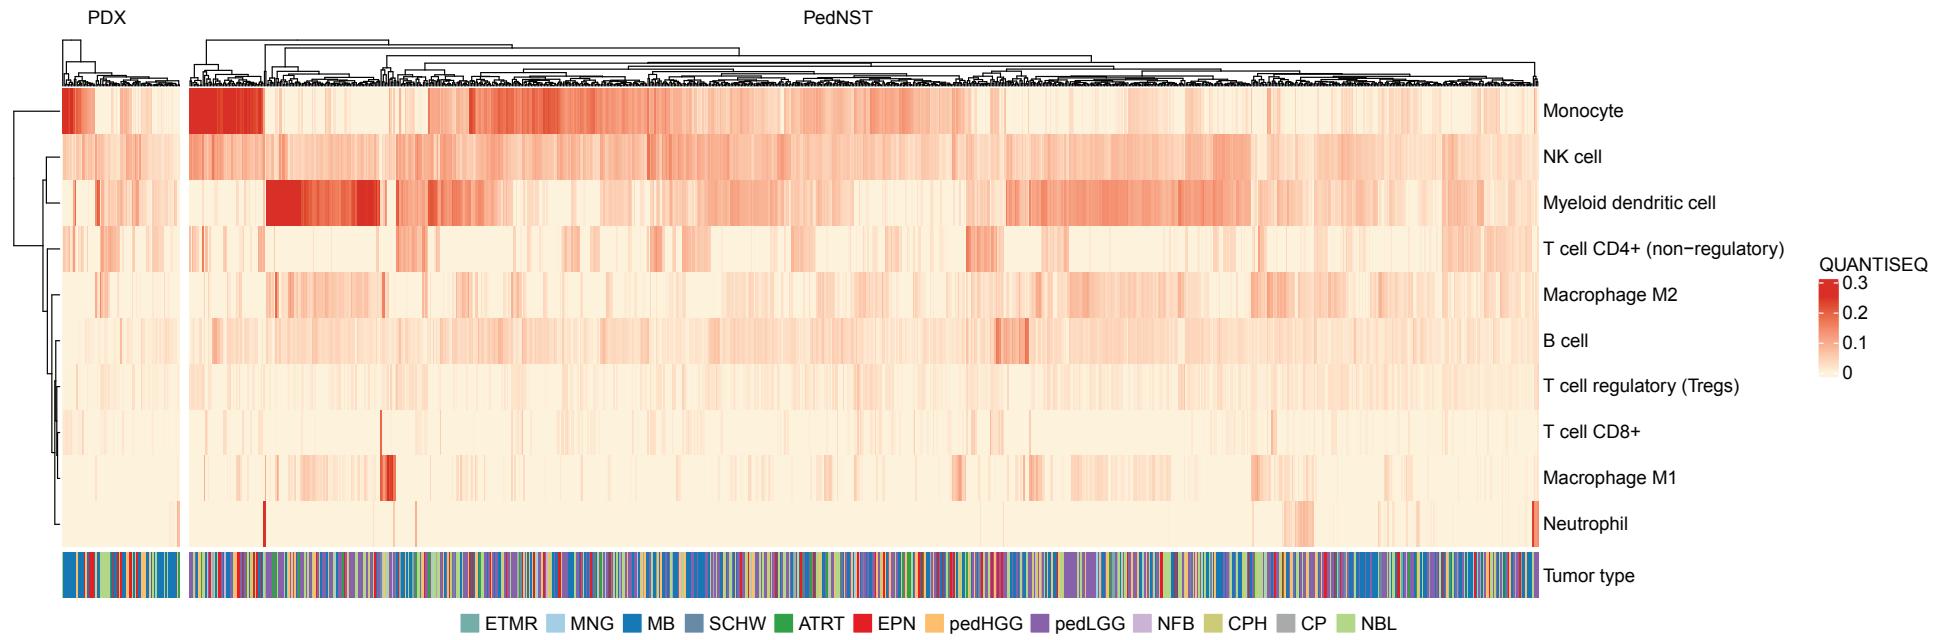

G)

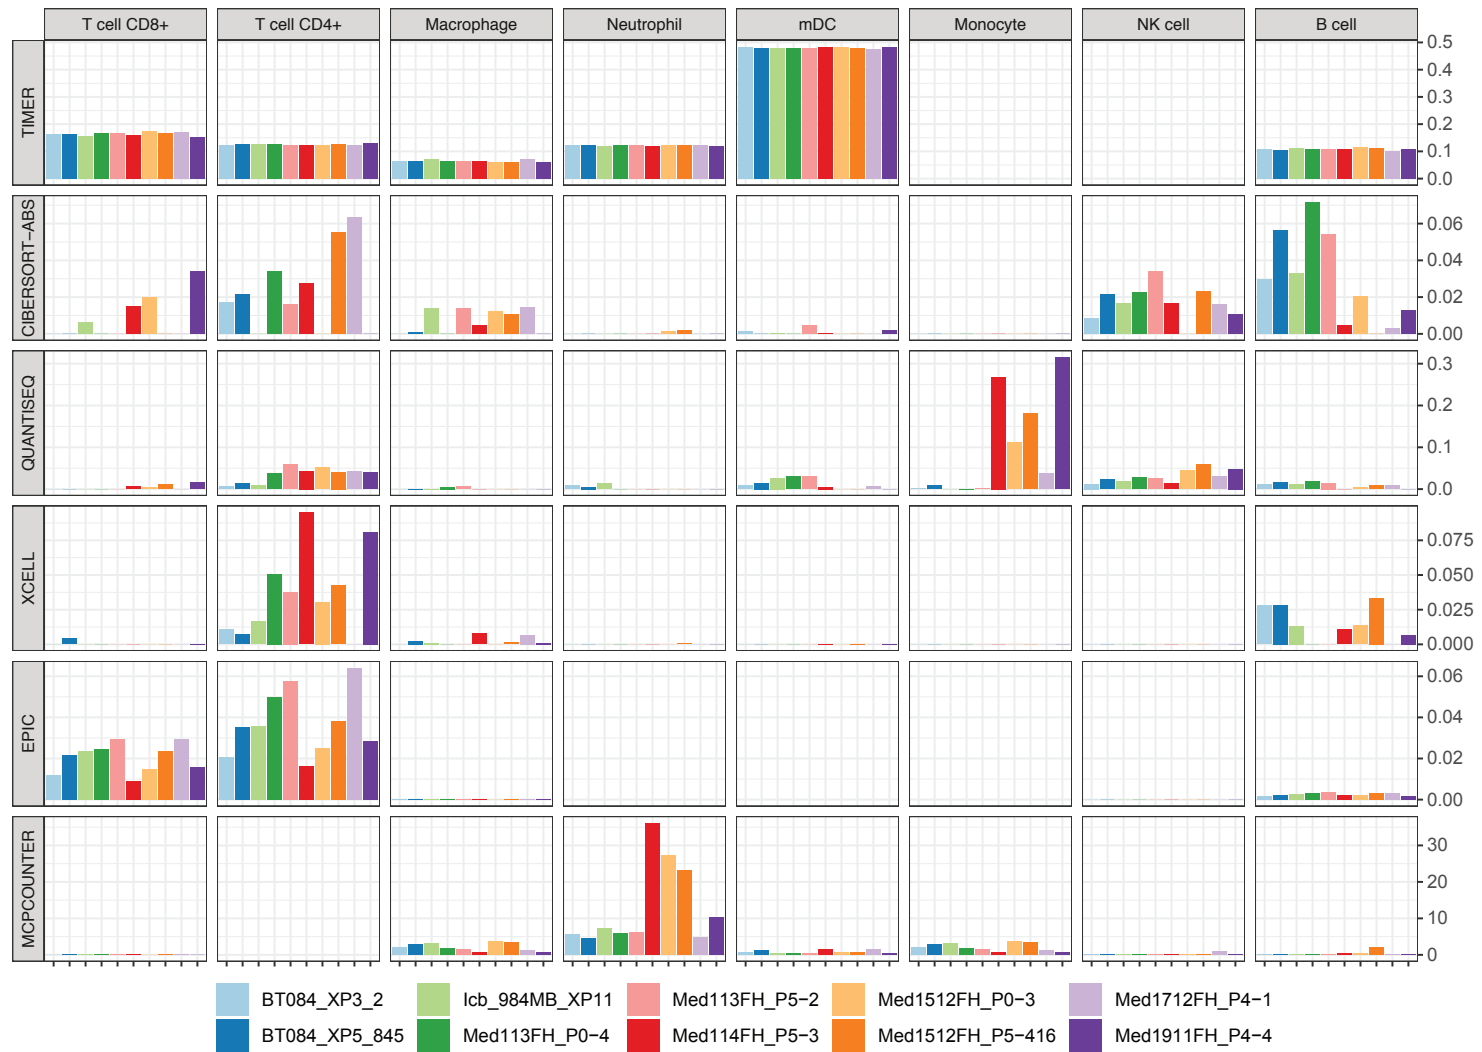

Figure S4

A)

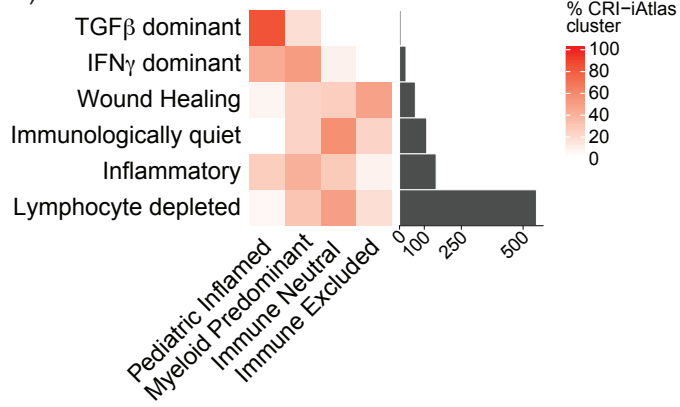

B)

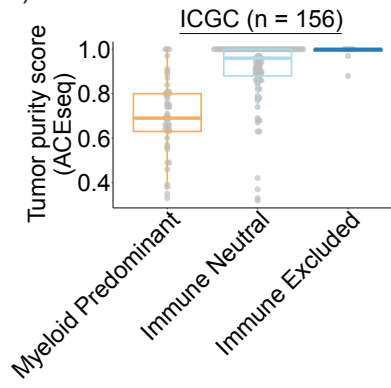

C)

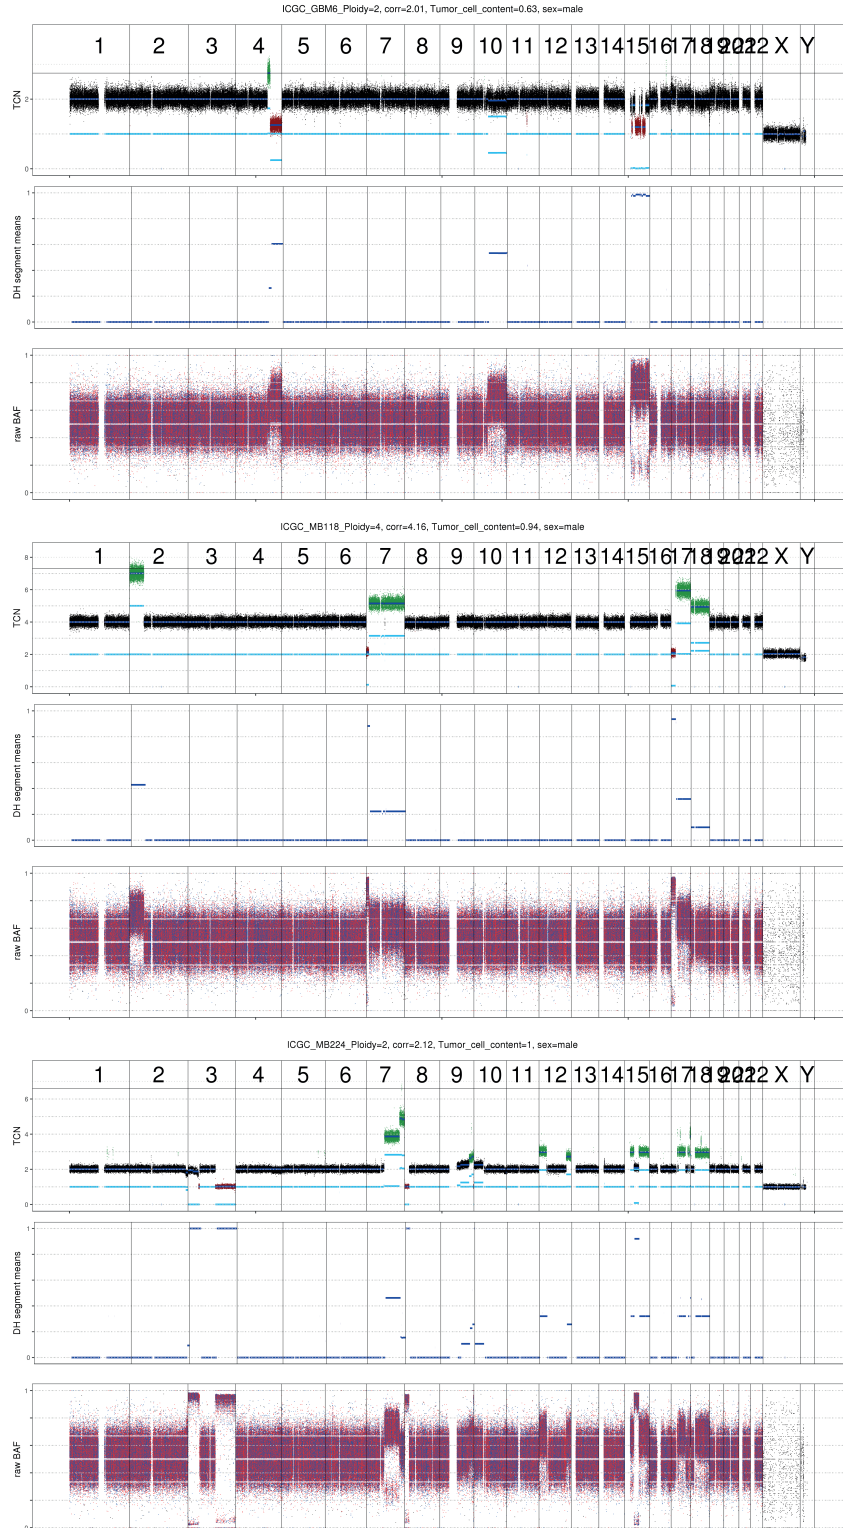

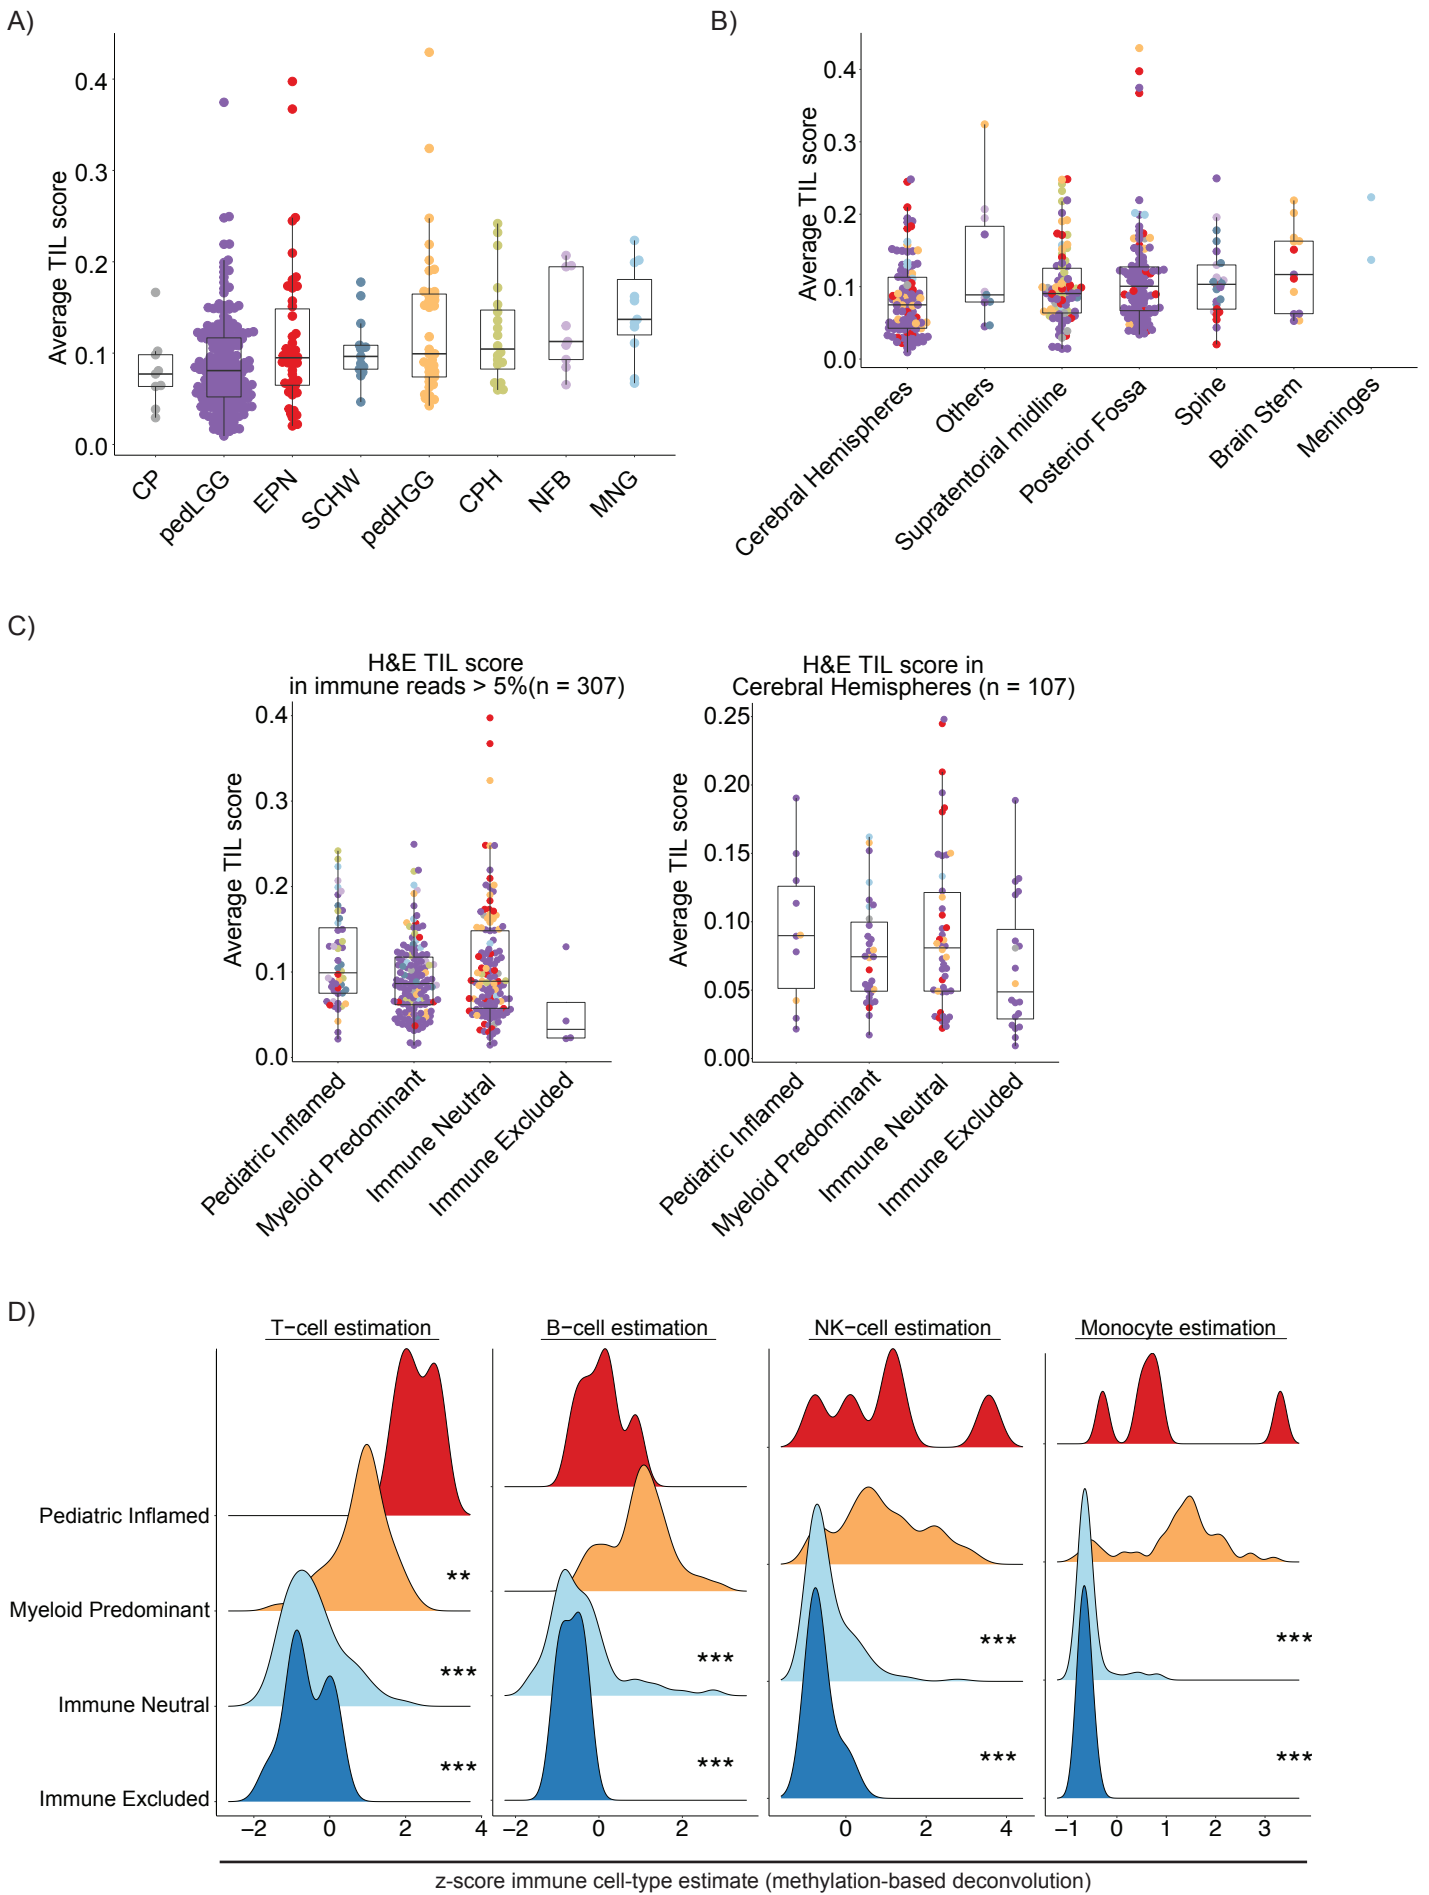

Figure S6

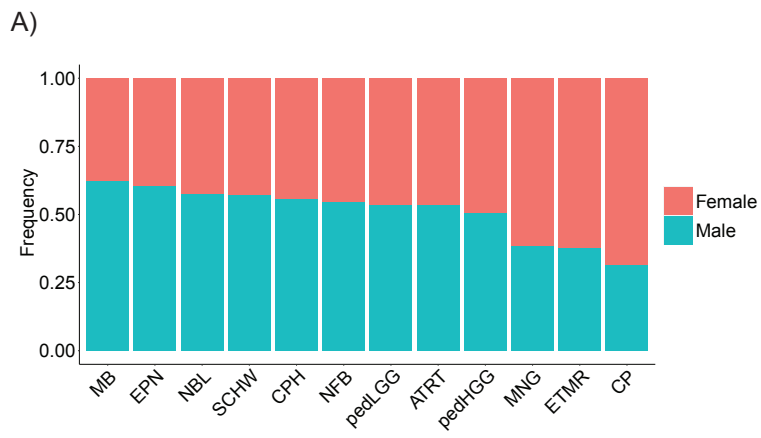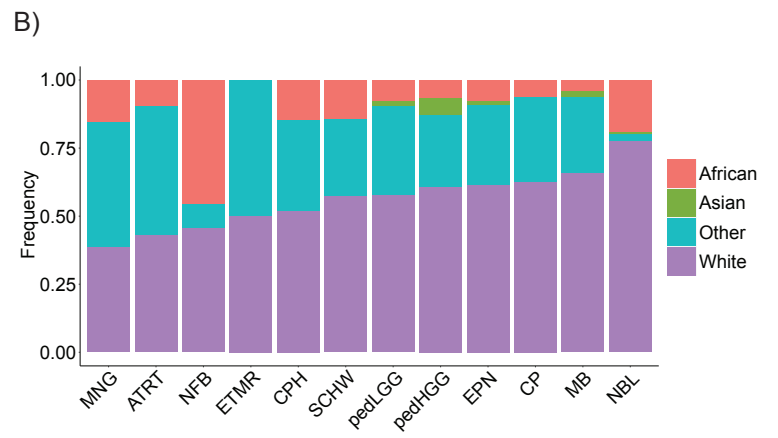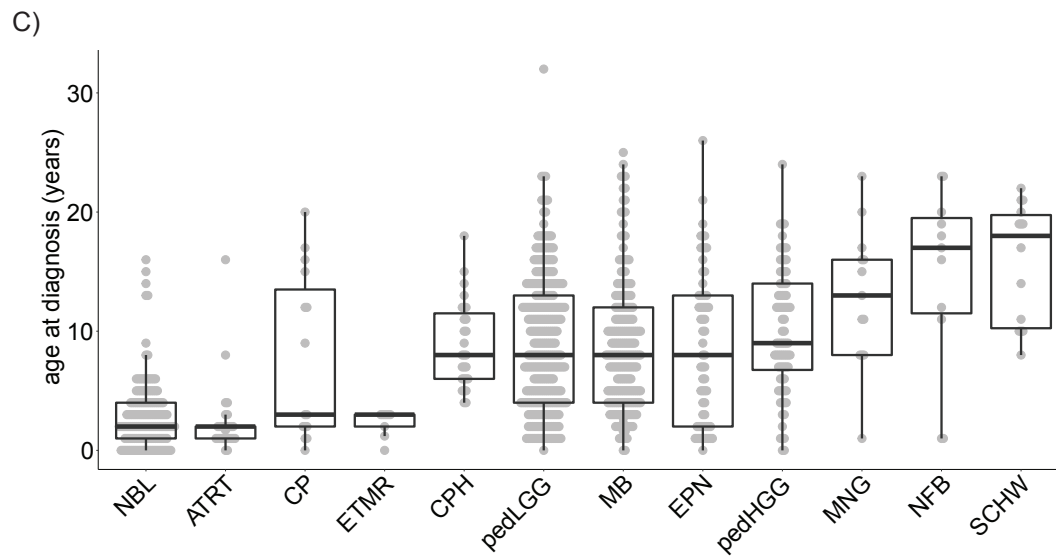

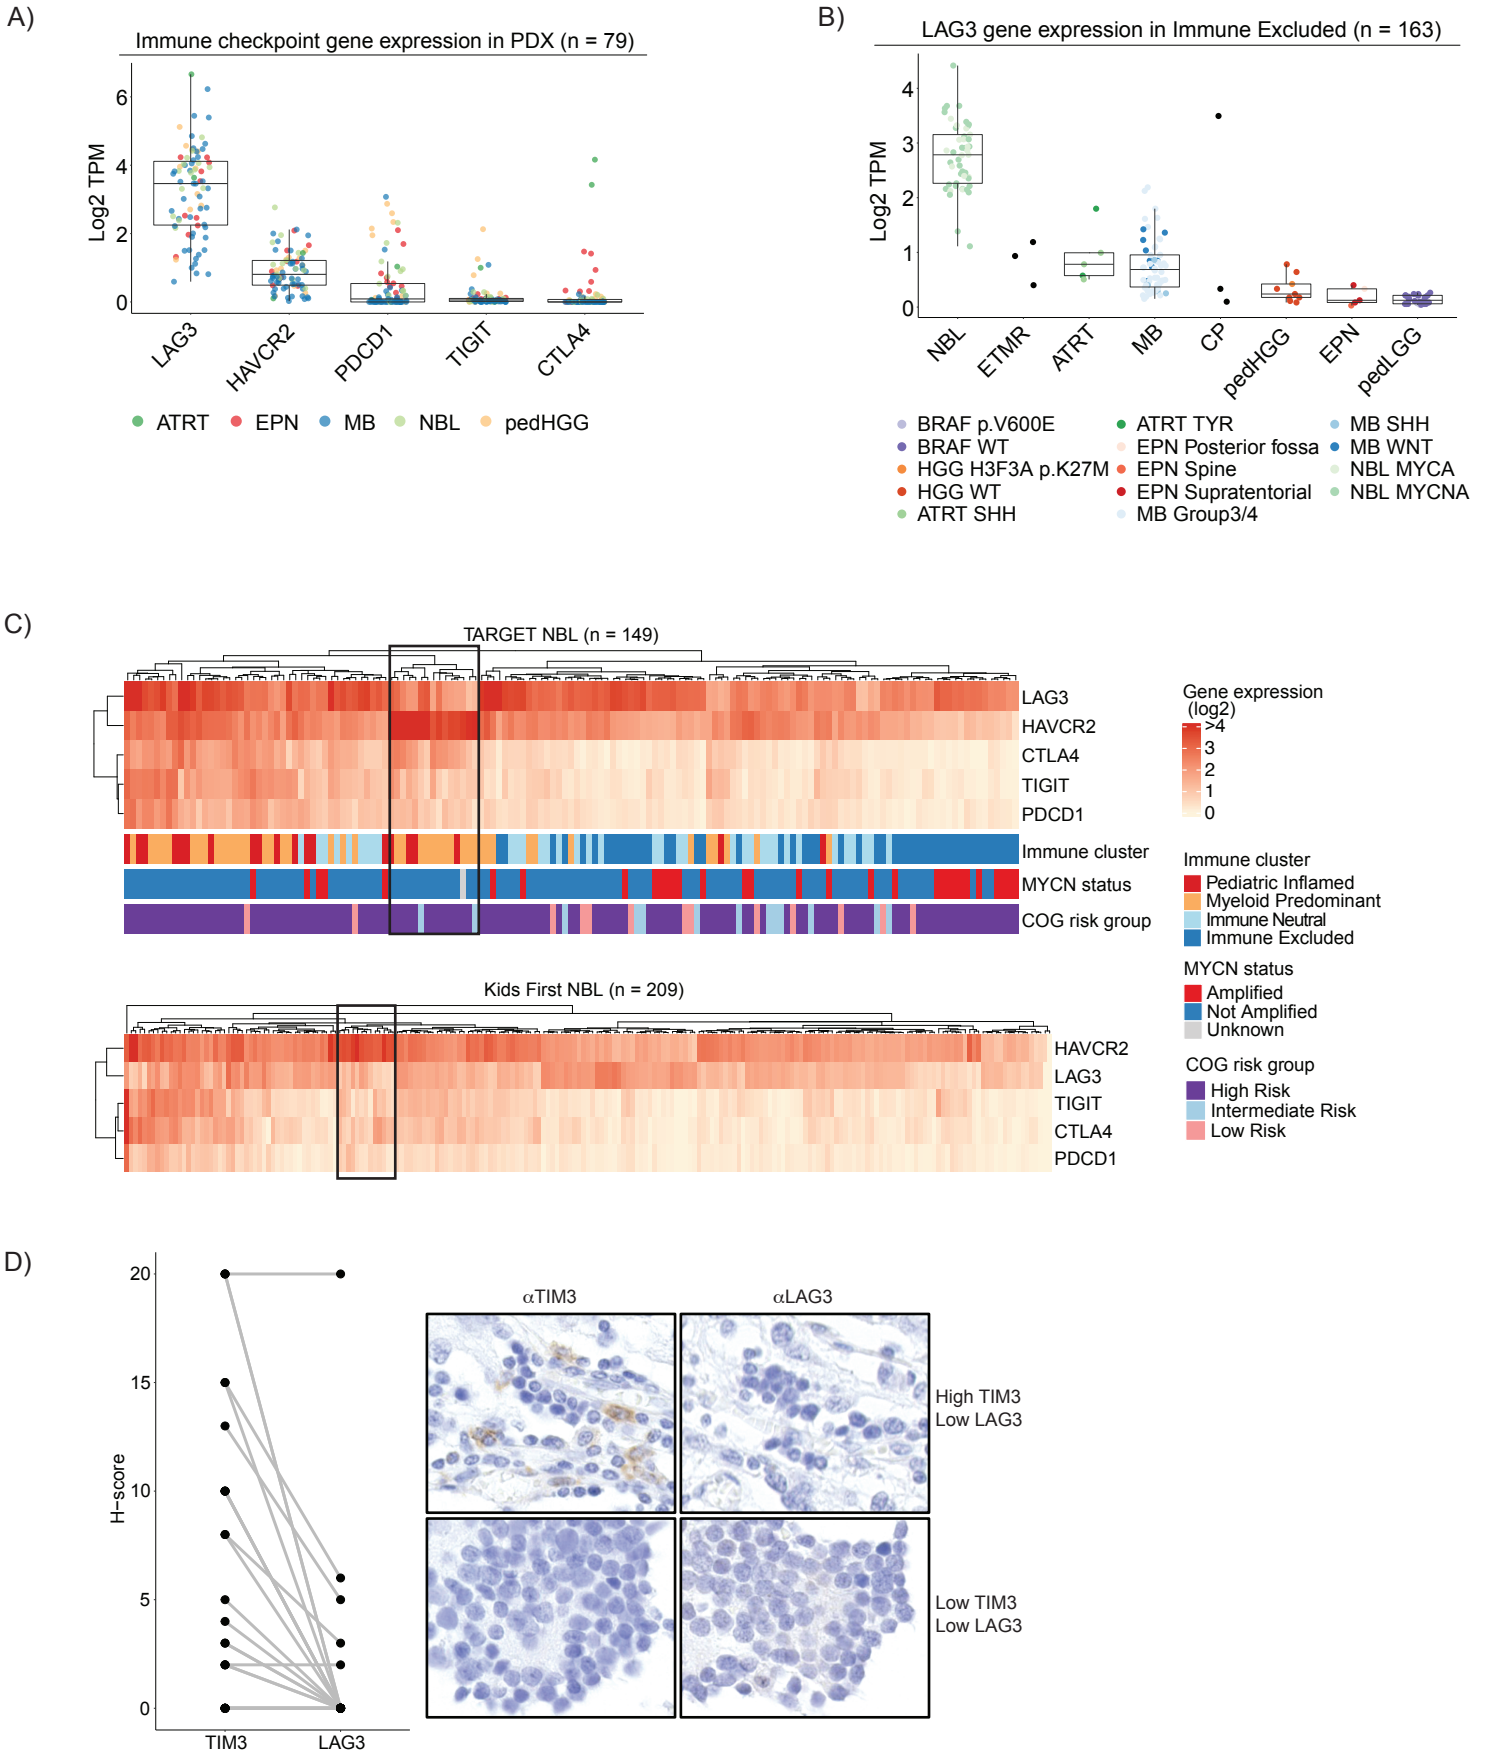

Figure S8

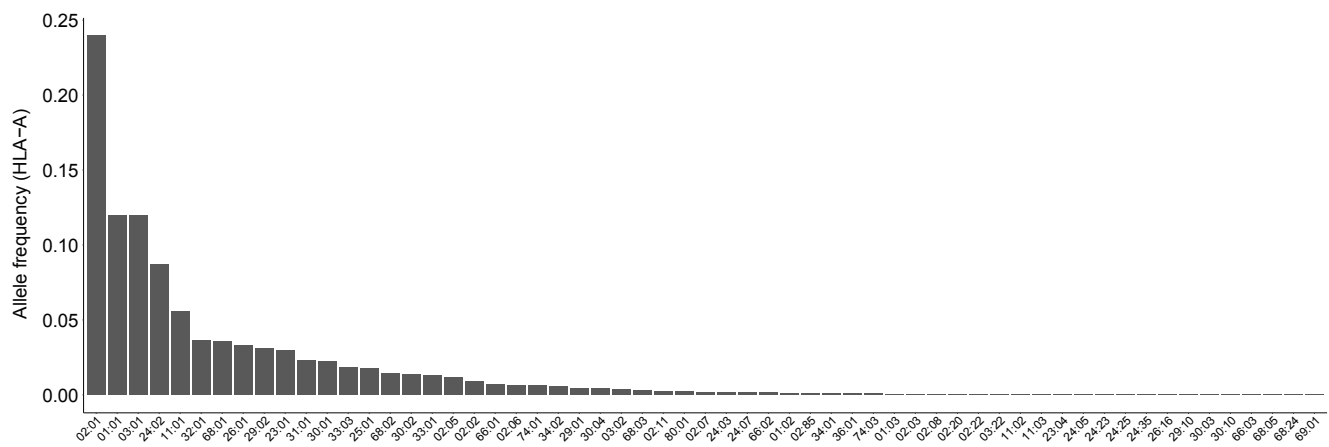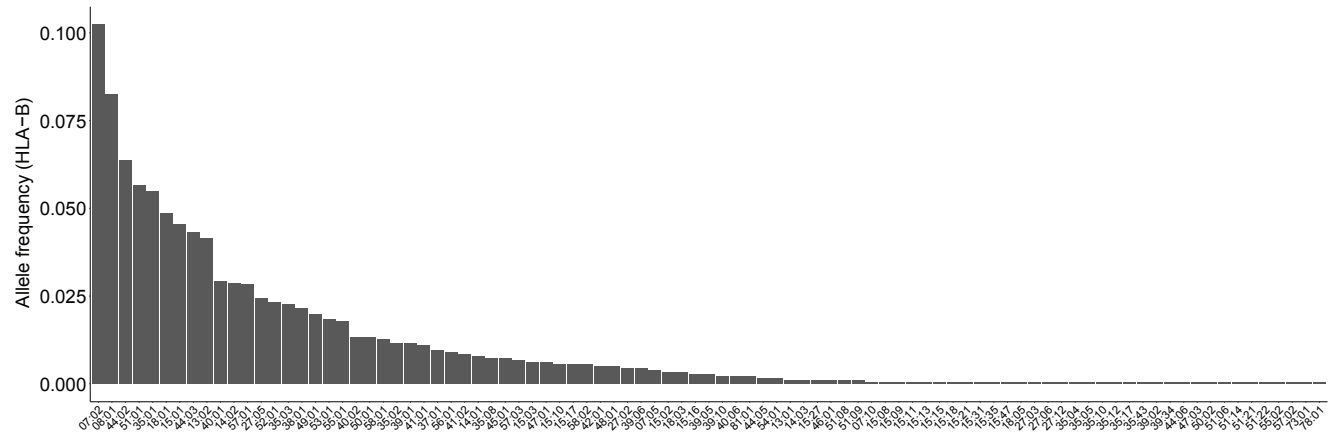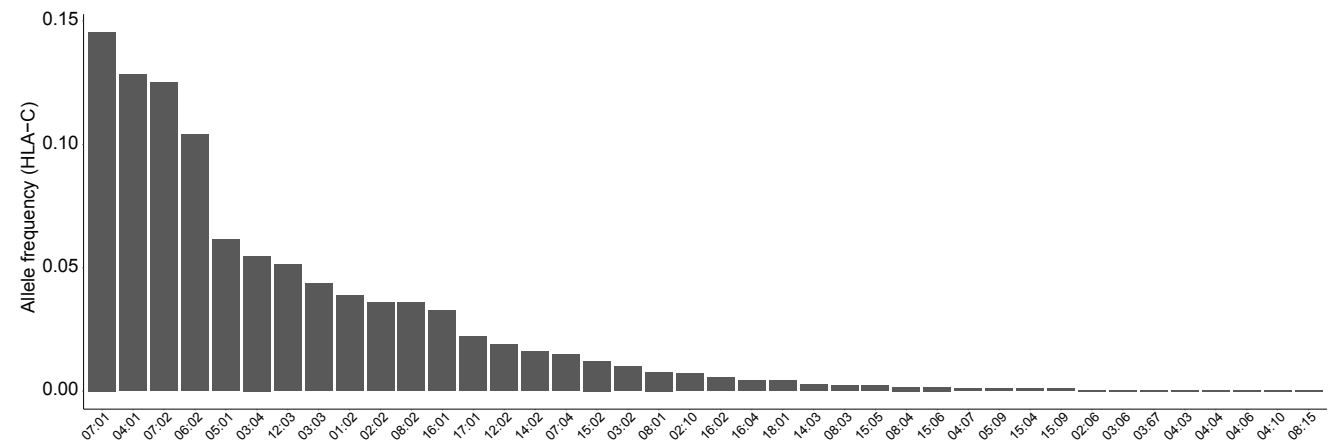

Figure S9

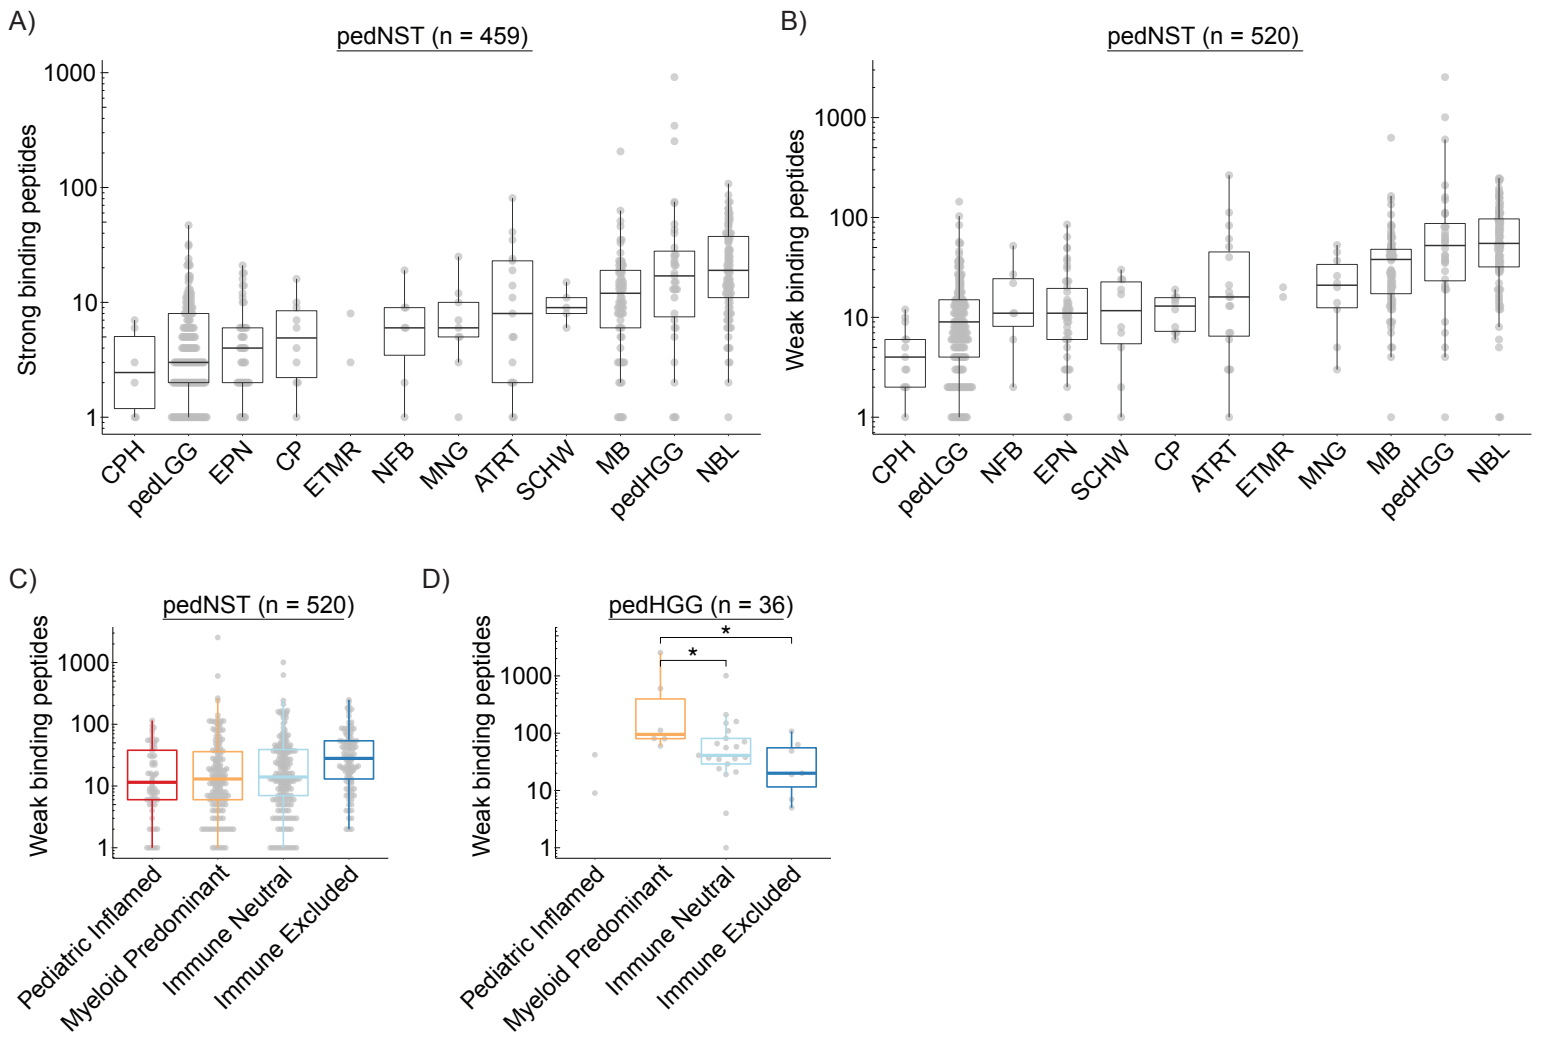

Figure S10



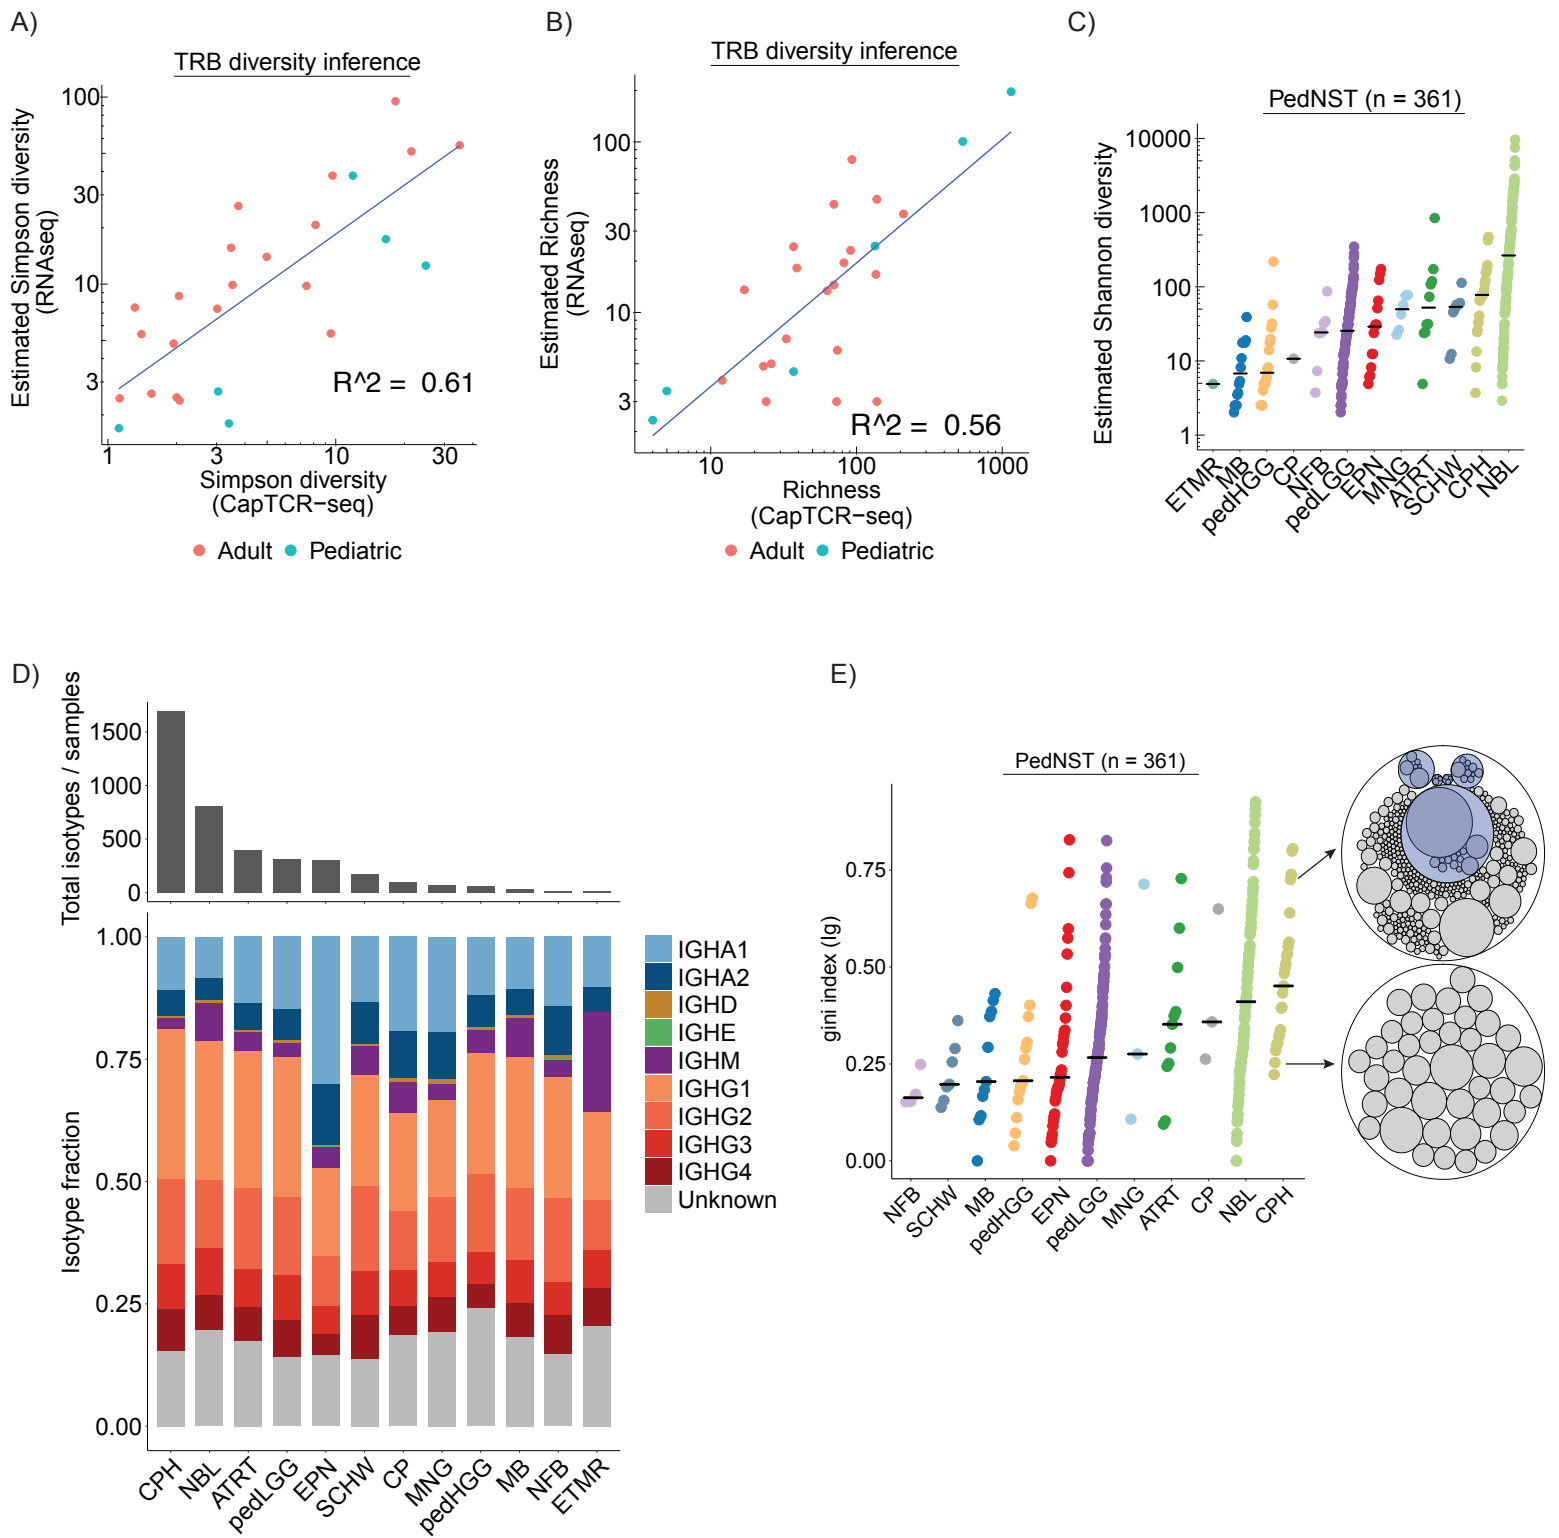

Figure S11

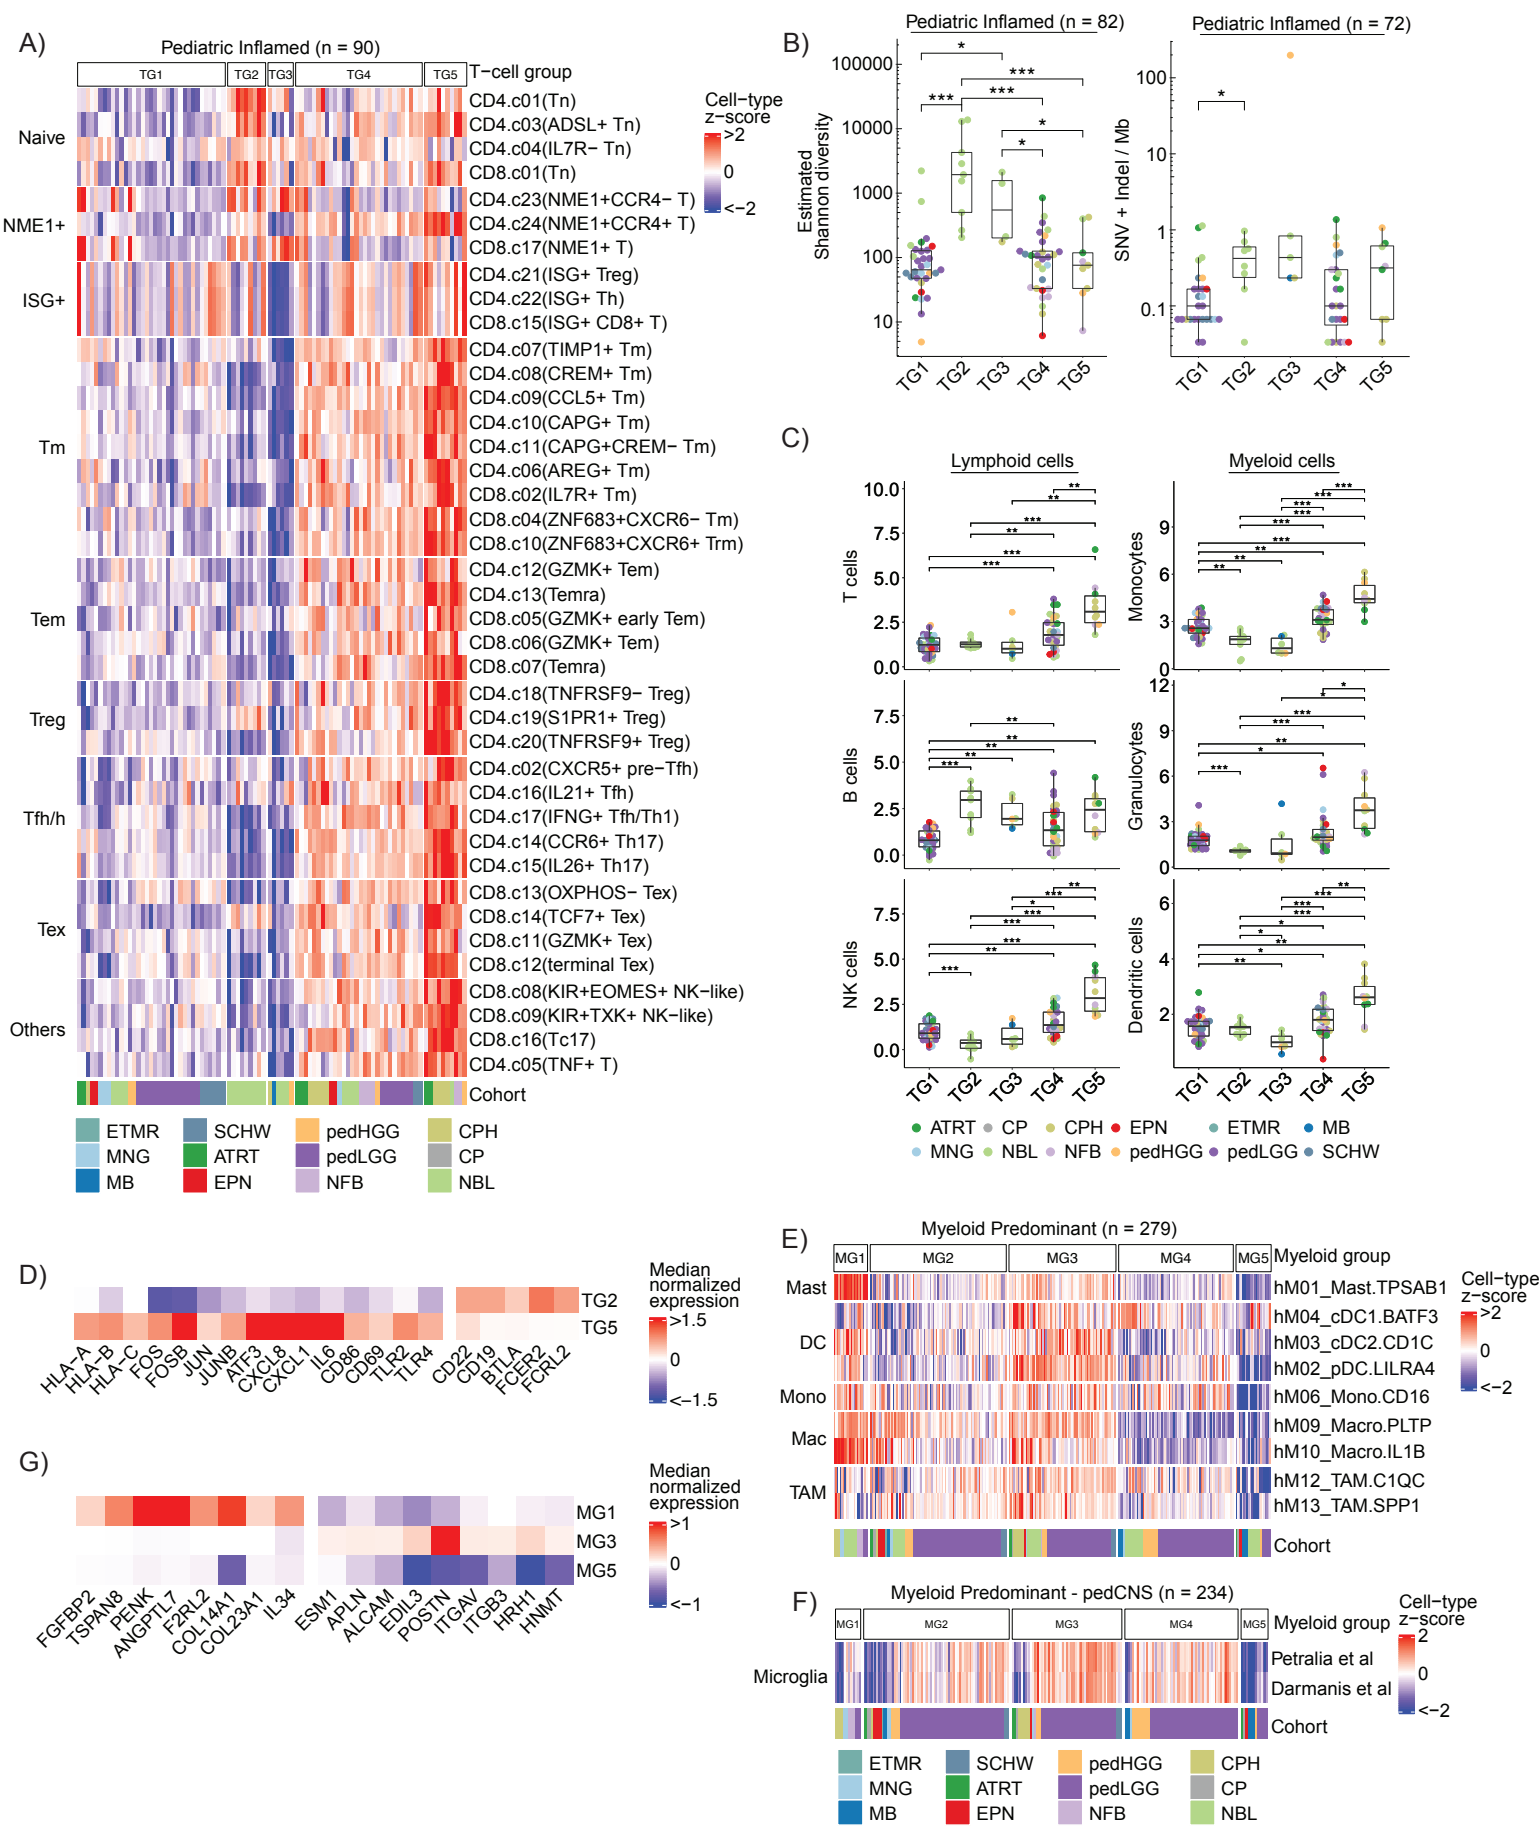

Figure S12
